# Supplementary material
Source: MDPI journal article supplement (https://www.mdpi.com/2311-553X/7/1/14)
Supplement: s1 [file s1]

## Article

# MicroRNAs and Long Non-Coding RNAs as Potential Candidates to Target Specific Motifs of SARS-CoV-2

Lucia Ntarelli <sup>1,\*</sup>, Luca Parca <sup>2,†</sup>, Tommaso Mazza <sup>2</sup>, Christian Weber <sup>1,3,4,5,\*</sup>, Fabio Virgili <sup>6</sup> and Deborah Fratantonio <sup>7</sup>

- <sup>1</sup> Institute for Cardiovascular Prevention (IPEK), Ludwig-Maximilians-Universität (LMU), 800336 Munich, Germany
- <sup>2</sup> IRCCS Casa Sollievo della Sofferenza, Laboratory of Bioinformatics, 71013 San Giovanni Rotondo (FG), Italy; l.parca@css-mendel.it (L.P.); t.mazza@css-mendel.it (T.M.)
- <sup>3</sup> German Center for Cardiovascular Research (DZHK), partner site Munich Heart Alliance, 80336 Munich, Germany
- <sup>4</sup> Department of Biochemistry, Cardiovascular Research Institute Maastricht (CARIM), Maastricht University, 6200 MD Maastricht, The Netherlands
- <sup>5</sup> Munich Cluster for Systems Neurology (SyNergy), 81377 Munich, Germany
- <sup>6</sup> Council for Agricultural Research and Economics, Research Center for Food and Nutrition, 00178 Rome, Italy; fabio.virgili@crea.gov.it
- <sup>7</sup> Biotechnology and Biopharmaceutics, Department of Biosciences, University of Bari Aldo Moro, 70125 Bari, Italy; deborah.fratantonio@uniba.it
- \* Correspondence: lnatarel@med.lmu.de (L.N.); christian.weber@med.uni-muenchen.de (C.W.)
- † These authors contributed equally to this paper.

**Citation:** Ntarelli, L.; Parca, L.; Mazza, T.; Weber, C.; Virgili, F.; Fratantonio, D. MicroRNAs and Long Non-Coding RNAs as Potential Candidates to Target Specific Motifs of SARS-CoV-2.

*Non-coding RNA* **2021**, *7*, x.  
<https://doi.org/10.3390/xxxxx>

Academic Editor: George A Calin

Received: 12 January 2021

Accepted: 16 February 2021

Published: 18 February 2021

**Publisher's Note:** MDPI stays neutral with regard to jurisdictional claims in published maps and institutional affiliations.

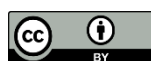

**Copyright:** © 2021 by the authors. Licensee MDPI, Basel, Switzerland. This article is an open access article distributed under the terms and conditions of the Creative Commons Attribution (CC BY) license (<http://creativecommons.org/licenses/by/4.0/>).

**Abstract:** The respiratory system is one of the most affected targets of SARS-CoV-2. Various therapies have been utilized to counter viral-induced inflammatory complications, with diverse success rates. Pending the distribution of an effective vaccine to the whole population and the achievement of a “herd immunity”, the discovery of novel specific therapies is to be considered a very important objective. Here we report a computational study demonstrating the existence of target motifs in SARS-CoV-2 genome suitable for a specific binding with endogenous human micro and long non-coding RNAs (miRNAs and lncRNAs, respectively), that can be therefore considered a conceptual background for the development of miRNA-based drugs against COVID-19. SARS-CoV-2 genome contains 3 motifs in the 5'UTR leader sequence recognized by selective nucleotides within the seed sequence of specific human miRNAs. The seed of 57 microRNAs contained a “GGG” motif that promoted leader sequence-recognition, primarily through offset-6mer sites able to promote microRNAs noncanonical binding to viral RNA. Similarly, lncRNA H19 binds to the 5'UTR of the viral genome and, more specifically, to the transcript of viral gene Spike, which has a pivotal role in viral infection. Notably, some of the non-coding RNAs identified in our study as candidates for inhibiting SARS-CoV-2 gene expression have already been proposed against diverse viral infections, pulmonary arterial hypertension, and related diseases.

**Keywords:** oligosequences; SARS-CoV-2; COVID-19; target therapy; non-coding RNAs

## 1. Supplementary Materials

**Table S3.** miRNA candidates with binding sites against SARS-CoV-2 leader sequence.

| miRNA             | BS type | GU | miRNA            | BS type     | GU |
|-------------------|---------|----|------------------|-------------|----|
| hsa-miR-1197      | 6mer    | 1  | hsa-miR-6825-5p  | 7mer-m8     | 1  |
| hsa-miR-1283      | 6mer    | -  | hsa-miR-7843-5p  | 7mer-m8     | 2  |
| hsa-miR-1292-5p   | 6mer    | 1  | hsa-miR-887-5p   | 7mer-m8     | -  |
| hsa-miR-219a-1-3p | 6mer    | 1  | hsa-miR-3686     | 7mer-m8     | 2  |
| hsa-miR-3605-5p   | 6mer    | 2  | hsa-miR-377-5p   | 8mer        | 2  |
| hsa-miR-4433a-3p  | 6mer    | 1  | hsa-miR-4314     | 7mer-m8     | 1  |
| hsa-miR-4460      | 6mer    | 3  | hsa-miR-204-3p   | 7mer-m8     | -  |
| hsa-miR-4475      | 6mer    | 1  | hsa-miR-296-3p   | 7mer-m8     | 2  |
| hsa-miR-449a      | 6mer    | 2  | hsa-miR-4464     | 7mer-m8     | 1  |
| hsa-miR-4510      | 6mer    | 2  | hsa-miR-4768-3p  | 7mer-m8     | 1  |
| hsa-miR-4652-5p   | 6mer    | 2  | hsa-miR-5004-5p  | 7mer-m8     | 1  |
| hsa-miR-4678      | 6mer    | -  | hsa-miR-571      | 7mer-m8     | 1  |
| hsa-miR-4693-3p   | 6mer    | 1  | hsa-miR-6529-5p  | 7mer-m8     | -  |
| hsa-miR-4760-5p   | 6mer    | 1  | hsa-miR-6716-5p  | 7mer-m8     | 2  |
| hsa-miR-495-5p    | 6mer    | -  | hsa-miR-6779-5p  | 7mer-m8     | 1  |
| hsa-miR-5572      | 6mer    | 2  | hsa-miR-4531     | 8mer        | 1  |
| hsa-miR-6513-5p   | 6mer    | 1  | hsa-miR-3123     | 8mer        | 1  |
| hsa-miR-653-3p    | 6mer    | 1  | hsa-miR-12135    | offset 6mer | 1  |
| hsa-miR-6742-3p   | 6mer    | -  | hsa-miR-1343-3p  | offset 6mer | -  |
| hsa-miR-6752-5p   | 6mer    | 2  | hsa-miR-3150b-3p | offset 6mer | 1  |
| hsa-miR-6774-5p   | 6mer    | 1  | hsa-miR-3610     | offset 6mer | 1  |
| hsa-miR-6788-5p   | 6mer    | 1  | hsa-miR-3661     | offset 6mer | -  |
| hsa-miR-6857-5p   | 6mer    | 2  | hsa-miR-381-3p   | offset 6mer | -  |
| hsa-miR-7155-5p   | 6mer    | 1  | hsa-miR-3976     | offset 6mer | -  |
| hsa-miR-9900      | 6mer    | 1  | hsa-miR-4507     | offset 6mer | 2  |
| hsa-let-7c-5p     | 6mer    | 2  | hsa-miR-451b     | offset 6mer | 1  |
| hsa-miR-1303      | 7mer-A1 | -  | hsa-miR-4520-3p  | offset 6mer | 1  |
| hsa-miR-3116      | 7mer-A1 | 1  | hsa-miR-4667-5p  | offset 6mer | 2  |
| hsa-miR-4644      | 7mer-A1 | 2  | hsa-miR-4725-3p  | offset 6mer | -  |
| hsa-miR-4747-5p   | 7mer-A1 | -  | hsa-miR-4731-5p  | offset 6mer | 1  |
| hsa-miR-6831-3p   | 7mer-A1 | 2  | hsa-miR-491-5p   | offset 6mer | 1  |
| hsa-miR-6883-5p   | 7mer-A1 | 1  | hsa-miR-519-2-5p | offset 6mer | -  |
| hsa-miR-7154-3p   | 7mer-A1 | 2  | hsa-miR-520b-5p  | offset 6mer | -  |
| hsa-miR-5087      | 7mer-A1 | -  | hsa-miR-6133     | offset 6mer | 2  |
| hsa-miR-7851-3p   | 7mer-A1 | -  | hsa-miR-6506-3p  | offset 6mer | 1  |
| hsa-miR-890       | 7mer-A1 | 1  | hsa-miR-6515-5p  | offset 6mer | 1  |
| hsa-miR-5192      | 7mer-A1 | 2  | hsa-miR-656-5p   | offset 6mer | 1  |
| hsa-miR-4527      | 7mer-A1 | 2  | hsa-miR-6731-5p  | offset 6mer | 2  |
| hsa-miR-6751-5p   | 7mer-A1 | 1  | hsa-miR-6795-5p  | offset 6mer | 3  |
| hsa-miR-6871-5p   | 7mer-A1 | 2  | hsa-miR-6810-5p  | offset 6mer | 2  |
| hsa-miR-3141      | 7mer-m8 | 3  | hsa-miR-6823-5p  | offset 6mer | 2  |
| hsa-miR-10397-3p  | 7mer-m8 | 1  | hsa-miR-6887-5p  | offset 6mer | 3  |
| hsa-miR-6780a-5p  | 7mer-m8 | 1  | hsa-miR-30c-1-3p | offset-6mer | 2  |
| hsa-miR-6825-5p   | 7mer-m8 | 1  | hsa-miR-3144-5p  | offset-6mer | 2  |

**Table S4.** miRNA candidates with BS against SARS-CoV-2 3'UTR.

| miRNA           | BS type | GU | miRNA            | BS type     | GU |
|-----------------|---------|----|------------------|-------------|----|
| hsa-miR-1183    | 6mer    | -  | hsa-miR-12114    | offset-6mer | 2  |
| hsa-miR-449c-5p | 6mer    | -  | hsa-miR-1304-3p  | offset-6mer | -  |
| hsa-miR-4710    | 6mer    | 1  | hsa-miR-130b-5p  | offset-6mer | 2  |
| hsa-miR-8071    | 6mer    | 1  | hsa-miR-1471     | offset-6mer | -  |
| hsa-miR-885-3p  | 6mer    | -  | hsa-miR-4456     | offset-6mer | -  |
| hsa-miR-1204    | 7mer-m8 | -  | hsa-miR-4525     | offset-6mer | -  |
| hsa-miR-183-5p  | 7mer-m8 | 1  | hsa-miR-4700-5p  | offset-6mer | -  |
| hsa-miR-22-5p   | 7mer-m8 | 1  | hsa-miR-4721     | offset-6mer | -  |
| hsa-miR-3605-3p | 7mer-m8 | 1  | hsa-miR-486-3p   | offset-6mer | 1  |
| hsa-miR-384     | 7mer-m8 | 1  | hsa-miR-5008-3p  | offset-6mer | 2  |
| hsa-miR-4328    | 7mer-m8 | 2  | hsa-miR-5010-5p  | offset-6mer | -  |
| hsa-miR-4446-3p | 7mer-m8 | 2  | hsa-miR-6507-3p  | offset-6mer | -  |
| hsa-miR-595     | 7mer-m8 | 1  | hsa-miR-6732-5p  | offset-6mer | -  |
| hsa-miR-6803-5p | 7mer-m8 | 1  | hsa-miR-6778-3p  | offset-6mer | -  |
| hsa-miR-6890-5p | 7mer-m8 | -  | hsa-miR-6796-3p  | offset-6mer | -  |
| hsa-miR-5093    | 8mer    | 1  | hsa-miR-92a-2-5p | offset-6mer | 1  |
| hsa-miR-6835-5p | 8mer    | 1  | hsa-miR-6867-3p  | 8mer        | -  |

**Table S5.** miRNA candidates with canonical BS against Spike mRNA (3'UTR).

| miRNA            | BS type | miRNA            | BS type     | miRNA             | BS type     |
|------------------|---------|------------------|-------------|-------------------|-------------|
| hsa-miR-1298-3p  | 6mer    | hsa-miR-4690-3p  | 7mer-m8     | hsa-miR-646       | offset-6mer |
| hsa-miR-4474-3p  | 6mer    | hsa-miR-604      | 7mer-m8     | hsa-miR-513b-5p   | offset-6mer |
| hsa-miR-3672     | 6mer    | hsa-miR-4278     | 7mer-m8     | hsa-miR-378a-5p   | offset-6mer |
| hsa-miR-7157-5p  | 6mer    | hsa-miR-3155b    | 7mer-m8     | hsa-miR-4802-5p   | offset-6mer |
| hsa-miR-4330     | 6mer    | hsa-miR-6501-3p  | 7mer-m8     | hsa-miR-143-3p    | offset-6mer |
| hsa-miR-624-3p   | 6mer    | hsa-miR-3939     | 7mer-m8     | hsa-miR-555       | offset-6mer |
| hsa-miR-4524a-5p | 6mer    | hsa-miR-4733-3p  | 7mer-m8     | hsa-miR-425-5p    | offset-6mer |
| hsa-miR-548an    | 6mer    | hsa-miR-627-5p   | 7mer-m8     | hsa-miR-1287-3p   | offset-6mer |
| hsa-miR-939-3p   | 6mer    | hsa-miR-6890-3p  | 7mer-m8     | hsa-miR-1285-5p   | offset-6mer |
| hsa-miR-3145-5p  | 6mer    | hsa-miR-196a-3p  | 7mer-m8     | hsa-miR-7977      | offset-6mer |
| hsa-miR-605-3p   | 6mer    | hsa-miR-3686     | 7mer-m8     | hsa-miR-6715b-5p  | offset-6mer |
| hsa-miR-660-3p   | 6mer    | hsa-miR-4292     | 7mer-m8     | hsa-miR-651-3p    | offset-6mer |
| hsa-miR-548aq-5p | 6mer    | hsa-miR-4799-3p  | 7mer-m8     | hsa-miR-620       | offset-6mer |
| hsa-miR-1298-3p  | 6mer    | hsa-miR-632      | 7mer-m8     | hsa-miR-3127-3p   | offset-6mer |
| hsa-miR-4474-3p  | 6mer    | hsa-miR-5088-3p  | 7mer-m8     | hsa-miR-664a-5p   | offset-6mer |
| hsa-miR-3672     | 6mer    | hsa-miR-4306     | 7mer-m8     | hsa-miR-320b      | offset-6mer |
| hsa-miR-563      | 7mer-A1 | hsa-miR-4438     | 8mer        | hsa-miR-5003-5p   | offset-6mer |
| hsa-miR-3155a    | 7mer-m8 | hsa-miR-3616-3p  | 8mer        | hsa-miR-3622a-3p  | offset-6mer |
| hsa-miR-648      | 7mer-m8 | hsa-miR-4694-3p  | 8mer        | hsa-miR-4793-3p   | offset-6mer |
| hsa-miR-23a-3p   | 7mer-m8 | hsa-miR-3606-5p  | 8mer        | hsa-miR-320c      | offset-6mer |
| hsa-miR-4722-5p  | 7mer-m8 | hsa-miR-219b-5p  | 8mer        | hsa-miR-661       | offset-6mer |
| hsa-miR-5006-5p  | 7mer-m8 | hsa-miR-581      | 8mer        | hsa-miR-603       | offset-6mer |
| hsa-miR-4457     | 7mer-m8 | hsa-miR-12125    | 8mer        | hsa-miR-1226-3p   | offset-6mer |
| hsa-miR-4678     | 7mer-m8 | hsa-miR-4500     | 8mer        | hsa-miR-3138      | offset-6mer |
| hsa-miR-554      | 7mer-m8 | hsa-miR-548av-5p | 8mer        | hsa-miR-4742-5p   | offset-6mer |
| hsa-miR-492      | 7mer-m8 | hsa-miR-4641     | 8mer        | hsa-miR-7515      | offset-6mer |
| hsa-miR-4499     | 7mer-m8 | hsa-miR-19a-3p   | 8mer        | hsa-miR-196a-1-3p | offset-6mer |
| hsa-miR-135a-5p  | 7mer-m8 | hsa-miR-342-3p   | 8mer        | hsa-miR-515-3p    | offset-6mer |
| hsa-miR-3193     | 7mer-m8 | hsa-miR-7705     | 8mer        | hsa-miR-410-3p    | offset-6mer |
| hsa-miR-4327     | 7mer-m8 | hsa-miR-3143     | 8mer        | hsa-miR-526b-5p   | offset-6mer |
| hsa-miR-6816-3p  | 7mer-m8 | hsa-miR-3085-5p  | 8mer        | hsa-miR-6881-5p   | offset-6mer |
| hsa-miR-324-3p   | 7mer-m8 | hsa-miR-4735-3p  | offset-6mer | hsa-miR-5000-3p   | offset-6mer |
| hsa-miR-1207-3p  | 7mer-m8 | hsa-miR-6088     | offset-6mer | hsa-miR-335-5p    | offset-6mer |
| hsa-miR-484      | 7mer-m8 | hsa-miR-320d     | offset-6mer | hsa-miR-6848-3p   | offset-6mer |
| hsa-miR-4662a-5p | 7mer-m8 | hsa-miR-1183     | offset-6mer | hsa-miR-205-3p    | offset-6mer |
| hsa-miR-708-5p   | 7mer-m8 | hsa-miR-4732-3p  | offset-6mer | hsa-miR-4768-3p   | offset-6mer |
| hsa-miR-6124     | 7mer-m8 | hsa-miR-4797-5p  | offset-6mer | hsa-miR-34b-5p    | offset-6mer |
| hsa-miR-1293     | 7mer-m8 | hsa-miR-4778-5p  | offset-6mer | hsa-miR-6529-3p   | offset-6mer |
| hsa-miR-6895-3p  | 7mer-m8 | hsa-miR-490-3p   | offset-6mer | hsa-miR-6776-5p   | offset-6mer |
| hsa-miR-4421     | 7mer-m8 | hsa-miR-6508-5p  | offset-6mer | hsa-miR-616-5p    | offset-6mer |
| hsa-miR-2278     | 7mer-m8 | hsa-miR-200b-3p  | offset-6mer | hsa-miR-6727-3p   | offset-6mer |
| hsa-miR-4668-5p  | 7mer-m8 |                  |             |                   |             |

**Table S6.** SARS-CoV-2 consensus motifs identified at the 5'UTR leader sequence

|                         | RNAplex |          | RNAup |          | IntaRNA |          |
|-------------------------|---------|----------|-------|----------|---------|----------|
| SARS-CoV-2 leader motif | Sites   | E-value  | Sites | E-value  | Sites   | E-value  |
| UnUnGAUCUnU             | 16      | 8.5e-038 | 14    | 8.2e-028 | 19      | 5.9e-052 |
| AACnAAC                 | 11      | 6.4e-014 | 6     | 2.9e-004 | 8       | 4.8e-005 |
| AUACCUUCCCA             | 4       | 1.4e-002 | 3     | 1.8e-001 | 6       | 1.0e-003 |

| MiRNAs recognizing the UnUnGAUCUnU leader motif |                |                         |                |                         |                |
|-------------------------------------------------|----------------|-------------------------|----------------|-------------------------|----------------|
| IntaRNA                                         |                | RNAup                   |                | RNAplex                 |                |
| miRNA                                           | p-value        | miRNA                   | p-value        | miRNA                   | p-value        |
| hsa-miR-10397-3p                                | 5.54e-6        | -                       | -              | -                       | -              |
| hsa-miR-1197                                    | 5.11e-7        | -                       | -              | -                       | -              |
| hsa-miR-1303                                    | 5.11e-7        | -                       | -              | -                       | -              |
| hsa-miR-3141                                    | 5.11e-7        | hsa-miR-3141            | 4.54e-7        | hsa-miR-3141            | 2.49e-7        |
| hsa-miR-3144-5p                                 | 5.11e-7        | -                       | -              | hsa-miR-3144-5p         | 2.49e-7        |
| hsa-miR-3605-5p                                 | 5.11e-7        | hsa-miR-3605-5p         | 4.54e-7        | hsa-miR-3605-5p         | 2.49e-7        |
| hsa-miR-3686                                    | 5.54e-6        |                         |                | hsa-miR-3686            | 6.12e-6        |
| hsa-miR-4433a-3p                                | 5.54e-6        | hsa-miR-4433a-3p        | 7.48e-6        | -                       | -              |
| hsa-miR-4527                                    | 5.54e-6        | -                       | -              | -                       | -              |
| hsa-miR-4531                                    | 5.11e-7        | -                       | -              | -                       | -              |
| <b>hsa-miR-4644</b>                             | <b>5.11e-7</b> | -                       | -              | <b>hsa-miR-4644</b>     | <b>2.49e-7</b> |
| hsa-miR-4652-5p                                 | 5.11e-7        | -                       | -              | hsa-miR-4652-5p         | 2.49e-7        |
| hsa-miR-5004-5p                                 | 5.11e-7        | -                       | -              | hsa-miR-5004-5p         | 2.49e-7        |
| <b>hsa-miR-5192</b>                             | <b>5.11e-7</b> | <b>hsa-miR-5192</b>     | <b>4.54e-7</b> | <b>hsa-miR-5192</b>     | <b>6.12e-6</b> |
| <b>hsa-miR-5572</b>                             | <b>5.11e-7</b> | -                       | -              | -                       | -              |
| <b>hsa-miR-6716-5p</b>                          | <b>5.11e-7</b> | -                       | -              | -                       | -              |
| hsa-miR-6857-5p                                 | 5.11e-7        | -                       | -              | hsa-miR-6857-5p         | 2.49e-7        |
| <b>hsa-miR-6871-5p</b>                          | <b>5.54e-6</b> | <b>hsa-miR-6871-5p</b>  | <b>7.48e-6</b> | <b>hsa-miR-6871-5p</b>  | <b>6.12e-6</b> |
| -                                               | -              | <b>hsa-miR-377-5p</b>   | <b>7.48e-6</b> | <b>hsa-miR-377-5p</b>   | <b>6.12e-6</b> |
| hsa-miR-7154-3p                                 | 5.11e-7        | hsa-miR-7154-3p         | 4.54e-7        | hsa-miR-7154-3p         | 2.49e-7        |
| -                                               | -              | hsa-miR-9900            | 4.54e-7        | hsa-miR-9900            | 2.49e-7        |
| -                                               | -              | -                       | -              | hsa-miR-4768-3p         | 6.12e-6        |
| -                                               | -              | hsa-miR-6133            | 7.48e-6        | -                       | -              |
| -                                               | -              | hsa-miR-6529-5p         | 4.54e-7        | -                       | -              |
| -                                               | -              | hsa-miR-6780a-5p        | 7.48e-6        | -                       | -              |
| -                                               | -              | <b>hsa-let-7c-5p</b>    | <b>7.48e-6</b> | -                       | -              |
| hsa-miR-3123                                    | 5.11e-7        | hsa-miR-3123            | 7.48e-6        | hsa-miR-3123            | 2.49e-7        |
| -                                               | -              | -                       | -              | hsa-miR-1283            | 6.12e-6        |
| -                                               | -              | <b>hsa-miR-30c-1-3p</b> | <b>7.48e-6</b> | <b>hsa-miR-30c-1-3p</b> | <b>2.49e-7</b> |
| hsa-miR-3976                                    | 5.11e-7        | hsa-miR-3976            | 4.54e-7        |                         |                |

| MiRNAs recognizing the AACnAAC leader motif     |                |                        |                |                         |                |
|-------------------------------------------------|----------------|------------------------|----------------|-------------------------|----------------|
| IntaRNA                                         |                | RNAup                  |                | RNAplex                 |                |
| miRNA                                           | p-value        | miRNA                  | miRNA          | p-value                 | miRNA          |
| -                                               | -              | -                      | -              | <b>hsa-let-7c-5p</b>    | <b>1.77e-5</b> |
| hsa-miR-219a-1-3p                               | 1.16e-5        | -                      | -              | hsa-miR-219a-1-3p       | 1.77e-5        |
| hsa-miR-296-3p                                  | 1.16e-5        | -                      | -              | hsa-miR-296-3p          | 1.77e-5        |
| <b>hsa-miR-377-5p</b>                           | <b>1.16e-5</b> | -                      | -              | -                       | -              |
| <b>hsa-miR-4464</b>                             | <b>1.72e-5</b> | <b>hsa-miR-4464</b>    | <b>1.85e-6</b> | <b>hsa-miR-4464</b>     | <b>2.16e-5</b> |
| hsa-miR-449a                                    | 1.46e-4        | hsa-miR-449a           | 3.59e-6        | hsa-miR-449a            | 7.33e-6        |
| hsa-miR-495-5p                                  | 1.16e-5        | -                      | -              | -                       | -              |
| hsa-miR-5087                                    | 7.71e-5        | -                      | -              | hsa-miR-5087            | 6.95e-5        |
| <b>hsa-miR-6871-5p</b>                          | <b>1.16e-5</b> | -                      | -              | -                       | -              |
| -                                               | -              | <b>hsa-miR-6752-5p</b> | <b>3.59e-6</b> | <b>hsa-miR-6752-5p</b>  | <b>7.33e-6</b> |
| -                                               | -              | hsa-miR-6506-3p        | 1.85e-6        | -                       | -              |
| -                                               | -              | -                      | -              | <b>hsa-miR-5192</b>     | <b>1.77e-5</b> |
| -                                               | -              | -                      | -              | hsa-miR-6751-5p         | 1.77e-5        |
| -                                               | -              | -                      | -              | hsa-miR-6823-5p         | 7.33e-6        |
| <b>hsa-miR-30c-1-3p</b>                         | <b>1.16e-5</b> | -                      | -              | <b>hsa-miR-30c-1-3p</b> | <b>1.77e-5</b> |
| MiRNAs recognizing the AUACCUUCCCA leader motif |                |                        |                |                         |                |
| IntaRNA                                         |                | RNAup                  |                | RNAplex                 |                |
| miRNA                                           | p-value        | miRNA                  | miRNA          | p-value                 | miRNA          |
| hsa-miR-204-3p                                  | 2.24e-5        | hsa-miR-204-3p         | 1.09e-6        | hsa-miR-204-3p          | 7.37e-7        |
| -                                               | -              | hsa-miR-6825-5p        | 1.09e-6        | hsa-miR-6825-5p         | 7.37e-7        |
| hsa-miR-7155-5p                                 | 2.24e-5        | -                      | -              | hsa-miR-7155-5p         | 7.37e-7        |
| hsa-miR-4314                                    | 2.24e-5        | -                      | -              | -                       | -              |
| hsa-miR-7851-3p                                 | 2.24e-5        | -                      | -              | -                       | -              |
| hsa-miR-890                                     | 2.24e-5        | -                      | -              | -                       | -              |
| hsa-miR-1343-3p                                 | 2.24e-5        | hsa-miR-1343-3p        | 1.09e-6        | -                       | -              |
| -                                               | -              | <b>hsa-miR-6716-5p</b> | <b>1.09e-6</b> | -                       | -              |
| -                                               | -              | -                      | -              | hsa-miR-30c-1-3p        | 7.37e-7        |
| hsa-miR-3661                                    | 2.24e-5        | hsa-miR-3661           | 1.09e-6        | hsa-miR-3661            | 7.37e-7        |
| <b>hsa-miR-6752-5p</b>                          | <b>2.24e-5</b> | -                      | -              | <b>hsa-miR-6752-5p</b>  | <b>7.37e-7</b> |
| In bold, miRNAs recognizing more than one motif |                |                        |                |                         |                |

**Table S9.** Role of miRNA candidates against Spike transcript and the 3'UTR of SARS-CoV-2

| <b>miRNAs-Spike</b> | <b>Reported function</b>                                              | <b>Ref.</b> |
|---------------------|-----------------------------------------------------------------------|-------------|
| hsa-miR-548an       | Inhibitor of host antiviral response                                  | [1]         |
| hsa-miR-939-3p      | Pro-inflammatory role/extracellular vesicles                          | [2]         |
| hsa-miR-3145-5p     | Inhibitor of H1N1-related protein PB1                                 | [3]         |
| hsa-miR-563         | Promoter of cell proliferation by targeting LIN28B                    |             |
| hsa-miR-3155a       | cardiovascular disease biomarker                                      | [4]         |
| hsa-miR-648         | Inhibitor of PAH                                                      | [5]         |
| hsa-miR-23a-3p      | Implicated in the progression of PAH                                  | [6]         |
| hsa-miR-660-3p      | Downregulated in lung cancer                                          | [7]         |
| hsa-miR-4678        | Reumatic arthritic disease positive biomarker                         | [8]         |
| hsa-miR-135a-5p     | Protects from PAH                                                     | [9]         |
| hsa-miR-324-3p      | Upregulated at end-stage osteoarthritis                               | [10]        |
| hsa-miR-708-5p      | Potential diagnostic marker of lung cancer                            | [11]        |
| hsa-miR-627-5p      | Inhibits osteosarcoma cell proliferation/downregulated in PAH         | [12]        |
| hsa-miR-196a-3p     | Promoter of PAH                                                       | [13]        |
| hsa-miR-604         | Immuno-marker of HBV chronic infection in Korean patients             | [14]        |
| hsa-miR-219b-5p     | Involved in PAH                                                       | [15]        |
| hsa-miR-581         | Promotes HBV antigen expression by targeting DICER and EDEM1          | [16]        |
| hsa-miR-4500        | Inhibitor of PAH                                                      | [17]        |
| hsa-miR-19a-3p      | Marker of PAH due to congenital heart disease                         | [18]        |
| hsa-miR-3085-5p     | Human osteoarthritis marker and promoter                              | [19]        |
| hsa-miR-320c        | Promoter of PAH                                                       | [20]        |
| hsa-miR-661         | Promoter of NSCLC                                                     | [21]        |
| hsa-miR-7515        | Inhibitor of cell proliferation and growth of lung cancer             | [22]        |
| hsa-miR-200b-3p     | Protects against epithelial-to-mesenchymal transition bronchial cells | [23]        |
| hsa-miR-320d        | Marker in inhaled treatment of COPD                                   | [24]        |
| hsa-miR-335-5p      | Inhibitor of cell proliferation of NSCLC                              | [25]        |
| hsa-miR-920         | Altered expression in patients with arthritis                         |             |
| hsa-miR-378a-5p     | Affects lipid metabolism and storage                                  | [26]        |
| hsa-miR-555         | Anti-viral role                                                       | [27]        |
| hsa-miR-425-5p      | Controls lipogenesis and lipolysis in adipocytes                      | [28]        |
| hsa-miR-1287-3p     | Inhibits cancer growth                                                | [29]        |
| hsa-miR-7977        | Serum marker of lung adenocarcinoma                                   | [30]        |
| hsa-miR-664a-5p     | Promotes obstructive pulmonary disease                                | [31]        |
| hsa-miR-320b        | Marker, low levels indicates reduced survival of COPD patients        | [32]        |
| <b>miRNAs-3'UTR</b> | <b>Reported function</b>                                              | <b>ref</b>  |
| hsa-miR-1183        | Rheumatic heart disease diagnostic biomarker                          | [8]         |
| hsa-miR-4710        | Endothelial cell proliferation                                        | [33]        |
| hsa-miR-183-5p      | Immunity as miRNA cluster                                             | [34]        |
| hsa-miR-22-5p       | Promotes TH17 related pulmonary emphysema                             | [35]        |
| hsa-miR-6835-5p     | Promoter of LPS-induced endothelial inflammation                      | [36]        |
| hsa-miR-6867-3p     | Platelets thrombocytopenia                                            | [37]        |
| hsa-miR-1304-3p     | Inhibits NSCLC growth [in vitro]                                      | [38]        |

---

|                                                                                                                                                 |                                                              |          |
|-------------------------------------------------------------------------------------------------------------------------------------------------|--------------------------------------------------------------|----------|
| hsa-miR-130b-5p                                                                                                                                 | NSCLC oncomiRNA                                              |          |
| hsa-miR-6732-5p                                                                                                                                 | Biomarker of nasopharyngeal carcinoma                        | [39]     |
| hsa-miR-92a-2-5p                                                                                                                                | Suppresses anti-viral innate immunity/pulmonary inflammation | [40, 41] |
| PAH: pulmonary arterial hypertension; NSCLC: Non-small-cell lung carcinoma; COPD: Chronic obstructive pulmonary disease; HBV: Hepatitis B virus |                                                              |          |

---



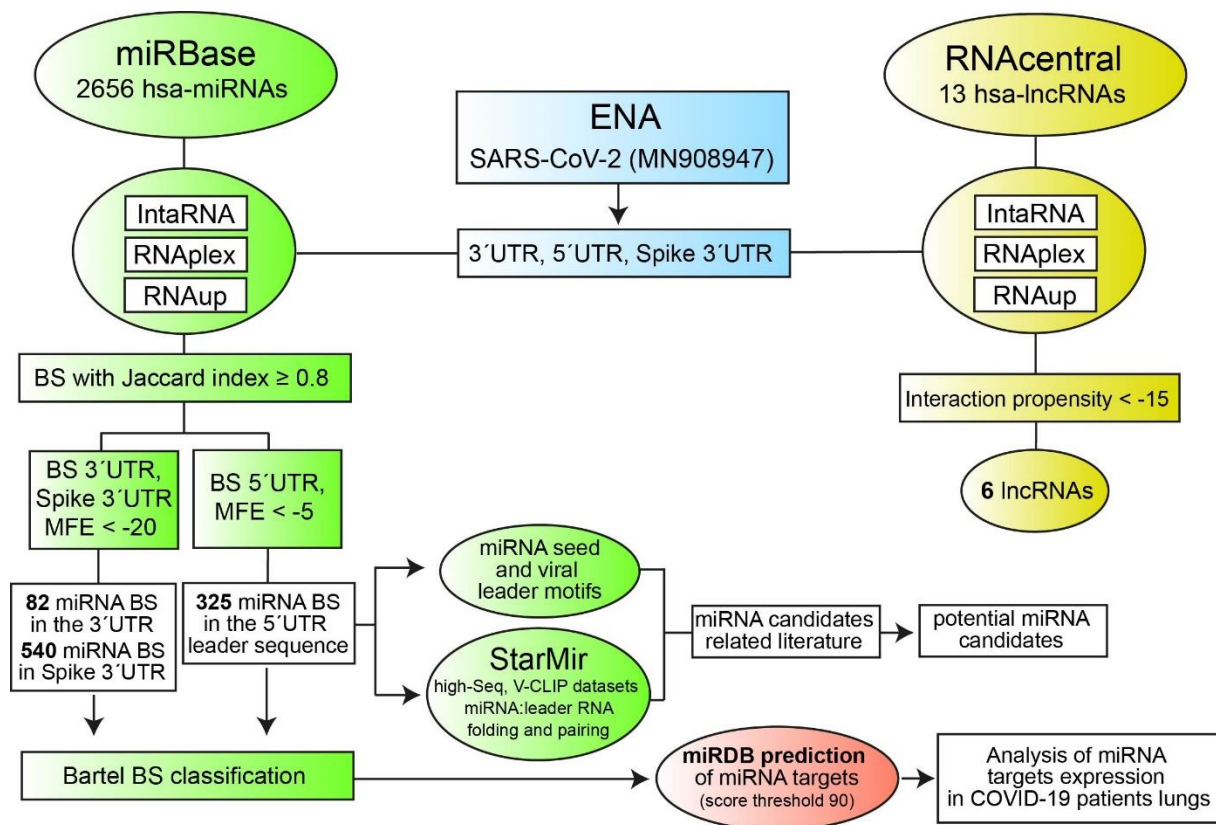

**Figure S1.** Schematic workflow for the entire study including the parameters/threshold used at each step.

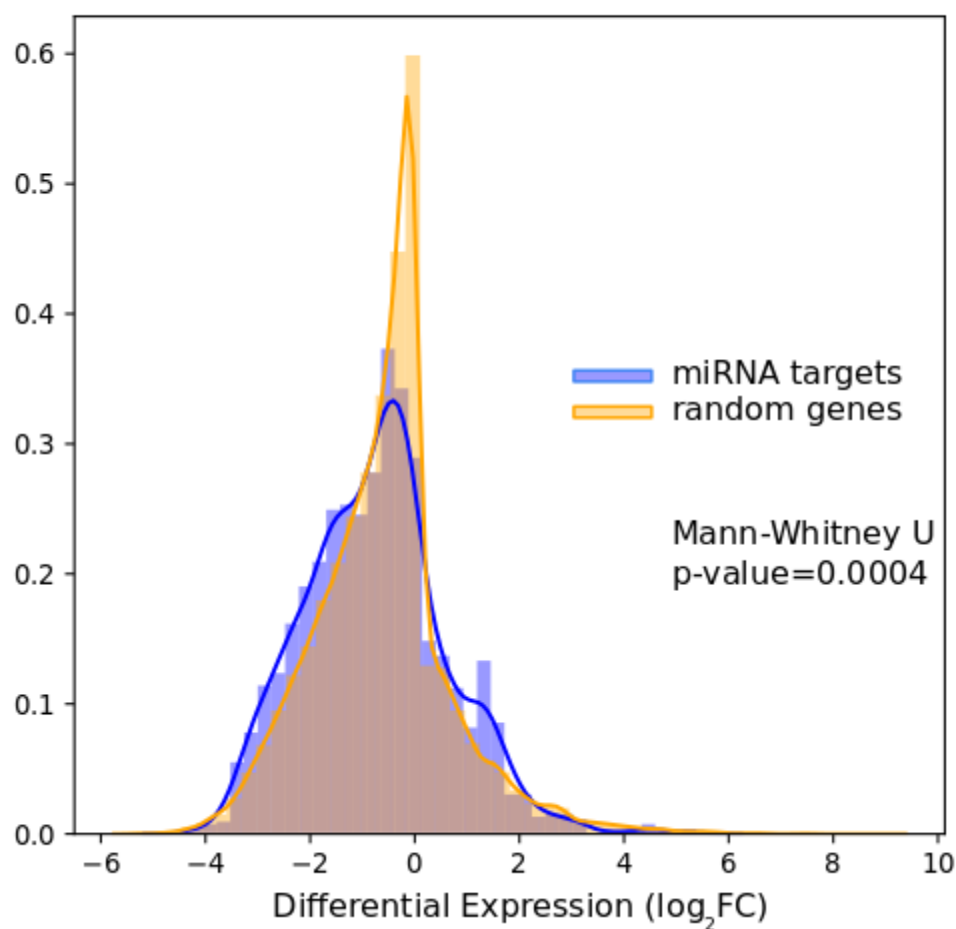

**Figure S2.** Distribution of the differential expression values ( $\log_2$  of the expression Fold Change, FC) of genes targeted by the miRNAs targeting the leader sequence of the SARS-CoV-2 virus (blue) and of an equal number of random genes (orange). Expression values have been collected from Blanco-Melo D. et al. (42). The two distributions are significantly different (Mann-Whitney U p-value < 0.01).

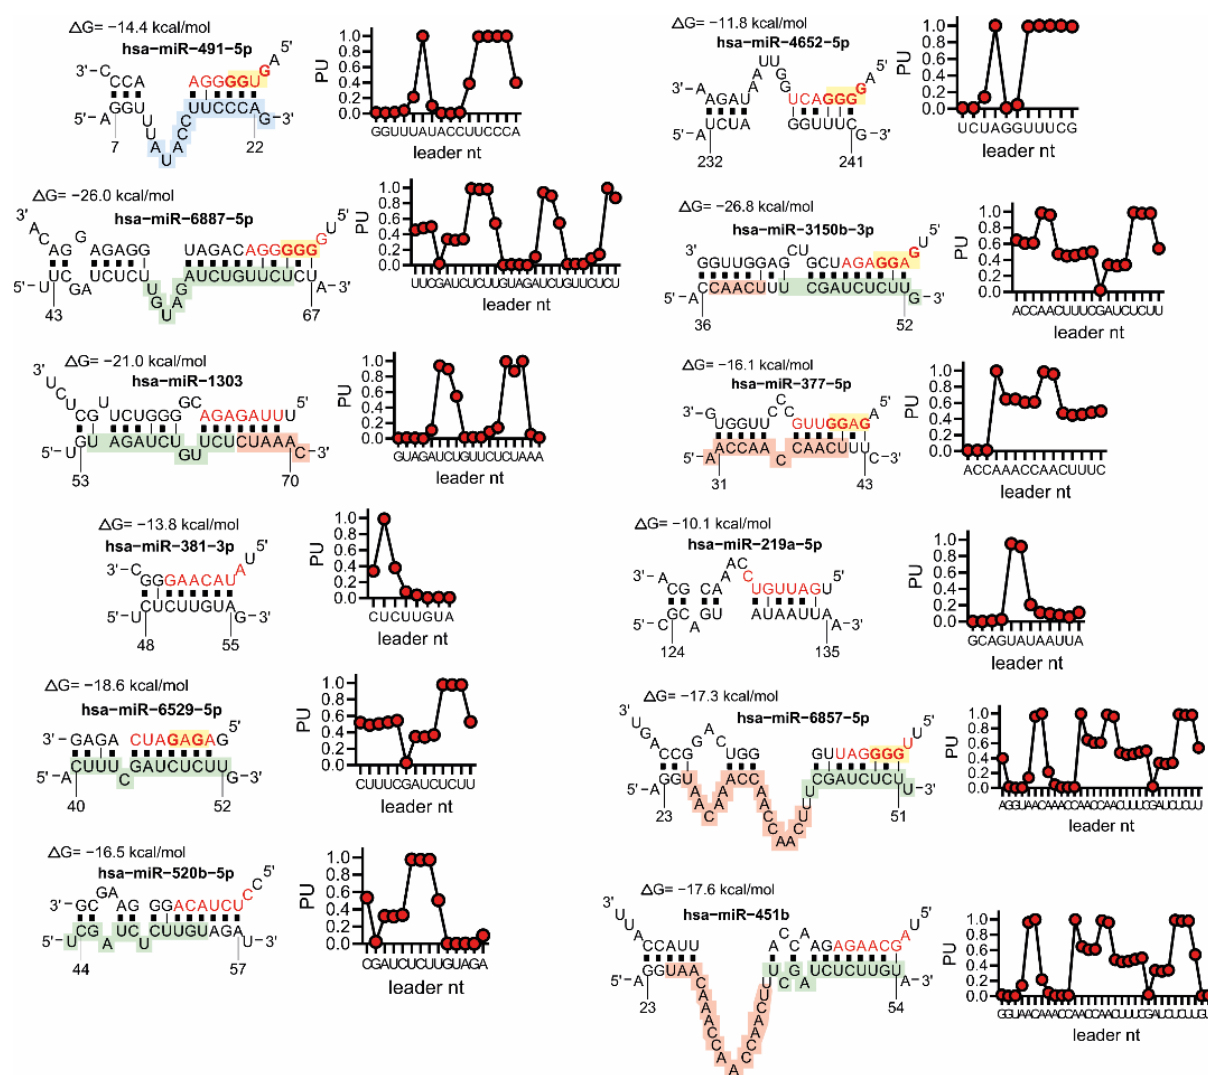

**Figure S3.** GGG motif and leader motifs from selected miRNA candidates interacting with the leader sequence of SARS-CoV-2. miRNAs reported in Table 1 and known regulators of pulmonary arterial hypertension, atherosclerosis, inflammation, and other diseases. In yellow the GGG motif. In green, red, and light blue the identified leader motifs. Total free energy is represented as  $\Delta G$  and expressed in kcal/mol. PU: probability of a nucleotide to be unpaired; nt: nucleotide.

## Supplementary References

- Li Y, Xie J, Xu X, Wang J, Ao F, Wan Y, et al. MicroRNA-548 down-regulates host antiviral response via direct targeting of IFN- $\lambda$ 1. *Protein Cell*. 2013;4(2):130-41.
- McDonald MK, Ramanathan S, Touati A, Zhou Y, Thanawala RU, Alexander GM, et al. Regulation of proinflammatory genes by the circulating microRNA hsa-miR-939. *Scientific Reports*. 2016;6(1):30976.
- Khongnomnan K, Makkoch J, Poomipak W, Poovorawan Y, Payungporn S. Human miR-3145 inhibits influenza A viruses replication by targeting and silencing viral PB1 gene. *Exp Biol Med (Maywood)*. 2015;240(12):1630-9.
- Ultimo S, Zauli G, Martelli AM, Vitale M, McCubrey JA, Capitani S, et al. Cardiovascular disease-related miRNAs expression: potential role as biomarkers and effects of training exercise. *Oncotarget*. 2018;9(24):17238-54.
- Li C, Gonsalves CS, Eiymo Mwa Mpollo M-S, Malik P, Tahara SM, Kalra VK. MicroRNA 648 Targets ET-1 mRNA and Is Cotranscriptionally Regulated with *MICAL3* by PAX5. *Molecular and Cellular Biology*. 2015;35(3):514-28.
- Sarrrión I, Juan G, Ramón M, Cortijo J, Mata M. Role of mir23a and PGC-1 alpha in pulmonary hypertension. *European Respiratory Journal*. 2013;42(Suppl 57):P5153.
- Fortunato O, Boeri M, Moro M, Verri C, Mensah M, Conte D, et al. Mir-660 is downregulated in lung cancer patients and its replacement inhibits lung tumorigenesis by targeting MDM2-p53 interaction. *Cell Death & Disease*. 2014;5(12):e1564-e.
- Li N, Lian J, Zhao S, Zheng D, Yang X, Huang X, et al. Detection of Differentially Expressed MicroRNAs in Rheumatic Heart Disease: miR-1183 and miR-1299 as Potential Diagnostic Biomarkers. *BioMed research international*. 2015;2015:524519.

9. Yan X, Li W, Yang L, Dong W, Chen W, Mao Y, et al. MiR-135a Protects Vascular Endothelial Cells Against Ventilator-Induced Lung Injury by Inhibiting PHLPP2 to Activate PI3K/Akt Pathway. *Cellular Physiology and Biochemistry*. 2018;48(3):1245-58.
10. Woods S, Barter MJ, Elliott HR, McGillivray CM, Birch MA, Clark IM, et al. miR-324-5p is up regulated in end-stage osteoarthritis and regulates Indian Hedgehog signalling by differing mechanisms in human and mouse. *Matrix Biology*. 2019;77:87-100.
11. Jang JS, Jeon HS, Sun Z, Aubry MC, Tang H, Park CH, et al. Increased miR-708 expression in NSCLC and its association with poor survival in lung adenocarcinoma from never smokers. *Clinical cancer research : an official journal of the American Association for Cancer Research*. 2012;18(13):3658-67.
12. Kheifets VO, Sucharov CC, Truong U, Dunning J, Hunter K, Ivy D, et al. Circulating miRNAs in Pediatric Pulmonary Hypertension Show Promise as Biomarkers of Vascular Function. *Oxid Med Cell Longev*. 2017;2017:4957147-.
13. Guerriero I, D'Angelo D, Pallante P, Santos M, Scrima M, Malanga D, et al. Analysis of miRNA profiles identified miR-196a as a crucial mediator of aberrant PI3K/AKT signaling in lung cancer cells. *Oncotarget*. 2017;8(12):19172-91.
14. Sarkar N, Chakravarty R. Hepatitis B Virus Infection, MicroRNAs and Liver Disease. *Int J Mol Sci*. 2015;16(8):17746-62.
15. Zhou G, Chen T, Raj JU. MicroRNAs in pulmonary arterial hypertension. *American journal of respiratory cell and molecular biology*. 2015;52(2):139-51.
16. Wang Y-Q, Ren Y-F, Song Y-J, Xue Y-F, Zhang X-J, Cao S-T, et al. MicroRNA-581 promotes hepatitis B virus surface antigen expression by targeting Dicer and EDEM1. *Carcinogenesis*. 2014;35(9):2127-33.
17. Zhang L, Qian J, Qiang Y, Huang H, Wang C, Li D, et al. Down-Regulation of miR-4500 Promoted Non-Small Cell Lung Cancer Growth. *Cellular Physiology and Biochemistry*. 2014;34(4):1166-74.
18. Chen W, Li S. Circulating microRNA as a Novel Biomarker for Pulmonary Arterial Hypertension Due to Congenital Heart Disease. *Pediatric Cardiology*. 2017;38(1):86-94.
19. Crowe N, Swingle TE, Le LTT, Barter MJ, Wheeler G, Pais H, et al. Detecting new microRNAs in human osteoarthritic chondrocytes identifies miR-3085 as a human, chondrocyte-selective, microRNA. *Osteoarthritis Cartilage*. 2016;24(3):534-43.
20. Matamala N, Otero Á, Vázquez I, Retana D, Muñoz-Callejas A, Fernández-González T, et al. MiR-320c regulates *SERPINA1* expression and is associated with pulmonary disease in alpha-1-antitrypsin deficiency. *European Respiratory Journal*. 2016;48(suppl 60):PA3406.
21. Liu F, Cai Y, Rong X, Chen J, Zheng D, Chen L, et al. MiR-661 promotes tumor invasion and metastasis by directly inhibiting RB1 in non small cell lung cancer. *Molecular Cancer*. 2017;16(1):122.
22. Lee JM, Yoo JK, Yoo H, Jung HY, Lee DR, Jeong HC, et al. The novel miR-7515 decreases the proliferation and migration of human lung cancer cells by targeting c-Met. *Molecular cancer research : MCR*. 2013;11(1):43-53.
23. Ladak SS, Roebuck E, Powell J, Fisher AJ, Ward C, Ali S. The Role of miR-200b-3p in Modulating TGF- $\beta$ 1-induced Injury in Human Bronchial Epithelial Cells. *Transplantation*. 2019;103(11).
24. Faiz A, Steiling K, Roffel MP, Postma DS, Spira A, Lenburg ME, et al. Effect of long-term corticosteroid treatment on microRNA and gene-expression profiles in Chronic Obstructive Pulmonary Disease. *European Respiratory Journal*. 2019;1801202.
25. Tang H, Zhu J, Du W, Liu S, Zeng Y, Ding Z, et al. CPNE1 is a target of miR-335-5p and plays an important role in the pathogenesis of non-small cell lung cancer. *Journal of Experimental & Clinical Cancer Research*. 2018;37(1):131.
26. Krist B, Florczyk U, Pietraszek-Gremplewicz K, Józkwicz A, Dulak J. The Role of miR-378a in Metabolism, Angiogenesis, and Muscle Biology. *International Journal of Endocrinology*. 2015;2015:281756.
27. Shim B-S, Wu W, Kyriakis CS, Bakre A, Jorquera PA, Perwitasari O, et al. MicroRNA-555 has potent antiviral properties against poliovirus. *Journal of General Virology*. 2016;97(3):659-68.
28. Qi R, Wang J, Wang Q, Qiu X, Yang F, Liu Z, et al. MicroRNA-425 controls lipogenesis and lipolysis in adipocytes. *Biochimica et Biophysica Acta (BBA) - Molecular and Cell Biology of Lipids*. 2019;1864(5):744-55.
29. Schwarzenbacher D, Klec C, Pasculli B, Cerik S, Rinner B, Karbiener M, et al. MiR-1287-5p inhibits triple negative breast cancer growth by interaction with phosphoinositide 3-kinase CB, thereby sensitizing cells for PI3Kinase inhibitors. *Breast Cancer Research*. 2019;21(1):20.
30. Chen L, Cao P, Huang C, Wu Q, Chen S, Chen F. Serum exosomal miR-7977 as a novel biomarker for lung adenocarcinoma. *Journal of cellular biochemistry*. 2020;121.
31. Zhong S, Chen C, Liu N, Yang L, Hu Z, Duan P, et al. Overexpression Of hsa-miR-664a-3p Is Associated With Cigarette Smoke-Induced Chronic Obstructive Pulmonary Disease Via Targeting FHL1. *Int J Chron Obstruct Pulmon Dis*. 2019;14:2319-29.
32. Keller A, Ludwig N, Fehlmann T, Kahraman M, Backes C, Kern F, et al. Low miR-150-5p and miR-320b Expression Predicts Reduced Survival of COPD Patients. *Cells*. 2019;8(10):1162.
33. Vidal-Gómez X, Pérez-Cremades D, Mompeón A, Dantas AP, Novella S, Hermenegildo C. MicroRNA as Crucial Regulators of Gene Expression in Estradiol-Treated Human Endothelial Cells. *Cellular physiology and biochemistry : international journal of experimental cellular physiology, biochemistry, and pharmacology*. 2018;45(5):1878-92.
34. Ichiyama K, Dong C. The role of miR-183 cluster in immunity. *Cancer letters*. 2019;443:108-14.
35. Lu W, You R, Yuan X, Yang T, Samuel ELG, Marciano DC, et al. The microRNA miR-22 inhibits the histone deacetylase HDAC4 to promote T(H)17 cell-dependent emphysema. *Nat Immunol*. 2015;16(11):1185-94.

36. Liu J, Li G, Chen C, Chen D, Zhou Q. MiR-6835 promoted LPS-induced inflammation of HUVECs associated with the interaction between TLR-4 and AdipoR1 in lipid rafts. *PLoS One*. 2017;12(11):e0188604.
37. Deng G, Yu S, He Y, Sun T, Liang W, Yu L, et al. MicroRNA profiling of platelets from immune thrombocytopenia and target gene prediction. *Molecular medicine reports*. 2017;16(3):2835-43.
38. Li C-G, Pu M-F, Li C-Z, Gao M, Liu M-X, Yu C-Z, et al. MicroRNA-1304 suppresses human non-small cell lung cancer cell growth in vitro by targeting heme oxygenase-1. *Acta Pharmacol Sin*. 2017;38(1):110-9.
39. Li K, Zhu X, Li L, Ning R, Liang Z, Zeng F, et al. Identification of non-invasive biomarkers for predicting the radiosensitivity of nasopharyngeal carcinoma from serum microRNAs. *Scientific Reports*. 2020;10(1):5161.
40. Sheng Y, Wang Y, Lu W, Zhou Y, Dong G, Ge X, et al. MicroRNA-92a inhibits macrophage antiviral response by targeting retinoic acid inducible gene-I. *Microbiology and immunology*. 2018;62(9):585-93.
41. Fu L, Zhu P, Qi S, Li C, Zhao K. MicroRNA-92a antagonism attenuates lipopolysaccharide (LPS)-induced pulmonary inflammation and injury in mice through suppressing the PTEN/AKT/NF- $\kappa$ B signaling pathway. *Biomedicine & Pharmacotherapy*. 2018;107:703-11.
42. Blanco-Melo D, Nilsson-Payant BE, Liu WC, Uhl S, Hoagland D, Möller R, et al. Imbalanced Host Response to SARS-CoV-2 Drives Development of COVID-19. *Cell*. 2020;181(5):1036-45.e9.
